# Supplementary material
Source: PubMed Central journal article supplement (PMC3259776)
Supplement: supp_M802996200_Supplementary_Movie_Legend.pdf [file supp_M802996200_Supplementary_Movie_Legend.pdf]

**Supplementary Movie 1.**

This movie shows the top view of *c-Flip*<sup>-/-</sup> MEFs stably expressing GFP-COX IV to reveal mitochondrial movements during cell death. The time-lapse covers a period of about 60 min after TNF $\alpha$  stimulation. It is evident that fission and fusion of mitochondria were gradually impaired, resulting in mitochondrial fragmentation (QuickTime; 964 KB).
